# Supplementary material for: Synthetic progress of organic thermally activated delayed fluorescence emitters via C–H activation and functionalization
Source: Royal Society of Chemistry journal article supplement (doi:10.1039/d3cs00871a), 2024-01-01
Supplement: d3cs00871a1.pdf [file d3cs00871a1.pdf]

## Electronic supplementary information

### **Synthetic progress of organic thermally activated delayed fluorescence emitters via C–H activation and functionalization**

Fan Ni,<sup>\*a</sup> Yipan Huang,<sup>a</sup> Longzhen Qiu,<sup>\*a</sup> Chuluo Yang<sup>\*b</sup>

<sup>a</sup> National Engineering Lab of Special Display Technology, State Key Lab of Advanced Display Technology, Academy of Opto-Electronic Technology, Intelligent Interconnected Systems Laboratory of Anhui, Anhui Province Key Laboratory of Measuring Theory and Precision Instrument, School of Instrument Science and Optoelectronic Engineering, Hefei University of Technology, Hefei, Anhui 230009, P. R. China. Email: [nfope@hfut.edu.cn](mailto:nfope@hfut.edu.cn), [lzhqiu@hfut.edu.cn](mailto:lzhqiu@hfut.edu.cn)

<sup>b</sup> Shenzhen Key Laboratory of New Information Display and Storage Materials, College of Materials Science and Engineering, Shenzhen University, Shenzhen, Guangdong 518060, P. R. China. E-mail: [clyang@szu.edu.cn](mailto:clyang@szu.edu.cn)

Table S1 List of abbreviations of general terms used in this review

---

| <b>Abbreviations</b>             | <b>Full meaning</b>                                              |
|----------------------------------|------------------------------------------------------------------|
| <b>TADF</b>                      | <b>Thermally activated delayed fluorescence</b>                  |
| <b>RISC</b>                      | <b>Reverse intersystem crossing</b>                              |
| <b>T<sub>1</sub></b>             | <b>Lowest excited triplet state</b>                              |
| <b>S<sub>1</sub></b>             | <b>Lowest singlet state</b>                                      |
| <b>S<sub>0</sub></b>             | <b>Ground state</b>                                              |
| <b>k<sub>RISC</sub></b>          | <b>Rate of reverse intersystem crossing process</b>              |
| <b>TTA</b>                       | <b>Triplet-triplet annihilation</b>                              |
| <b>D-A</b>                       | <b>Donor-acceptor</b>                                            |
| <b>ΔE<sub>ST</sub></b>           | <b>Energy gap between S<sub>1</sub> and T<sub>1</sub> states</b> |
| <b>SOC</b>                       | <b>Spin-orbit coupling</b>                                       |
| <b>k<sub>r</sub><sup>S</sup></b> | <b>Radiative rate of S<sub>1</sub> state</b>                     |
| <b>⟨S Ĥ<sub>SOC</sub> T⟩</b>     | <b>SOC matrix element</b>                                        |
| <b>k<sub>B</sub></b>             | <b>Boltzmann constant</b>                                        |
| <b>T</b>                         | <b>Temperature or triplet state</b>                              |
| <b>E<sub>S</sub></b>             | <b>Energy level of S<sub>1</sub> state</b>                       |
| <b>E<sub>T</sub></b>             | <b>Energy level of T<sub>1</sub> state</b>                       |
| <b>E</b>                         | <b>Orbital energy</b>                                            |
| <b>K</b>                         | <b>Electron repulsion energy</b>                                 |
| <b>J</b>                         | <b>Exchange energy</b>                                           |
| <b>HOMO</b>                      | <b>Highest occupied molecular orbital</b>                        |

---

---

|                          |                                                                    |
|--------------------------|--------------------------------------------------------------------|
| <b>LUMO</b>              | <b>Lowest unoccupied molecular orbital</b>                         |
| <b>FOMs</b>              | <b>Frontier molecular orbitals</b>                                 |
| <b>MR-TADF</b>           | <b>Multiple-resonance thermally activated delayed fluorescence</b> |
| <b>FWHM</b>              | <b>Full-width at half-maximum</b>                                  |
| <b>MLCT</b>              | <b>Metal-to-ligand charge transfer</b>                             |
| <b>LMCT</b>              | <b>Ligand-to-metal charge transfer</b>                             |
| <b>LLCT</b>              | <b>Ligand-to-ligand charge transfer</b>                            |
| <b>MADF</b>              | <b>Metal-assisted delayed fluorescence</b>                         |
| <b>PF</b>                | <b>Prompt fluorescence</b>                                         |
| <b>DF</b>                | <b>Delayed fluorescence</b>                                        |
| $k_{\text{ISC}}$         | <b>Rate of intersystem crossing process</b>                        |
| $k_r^T$                  | <b>Radiative rate of T<sub>1</sub> state</b>                       |
| <b>CT</b>                | <b>Charge transfer</b>                                             |
| <b>LE</b>                | <b>Locally excited</b>                                             |
| <b>Phos</b>              | <b>Phosphorescence</b>                                             |
| $k_{nr}^S$               | <b>Non-radiative rate of S<sub>1</sub> state</b>                   |
| $k_{\text{CQ}}$          | <b>Rate of concentration quenching of T<sub>1</sub> state</b>      |
| $k_{\text{IC}}$          | <b>Rate of internal conversion</b>                                 |
| $k_{\text{RIC}}$         | <b>Rate of reverse internal conversion</b>                         |
| <b>HFC</b>               | <b>Hyperfine coupling</b>                                          |
| <b>OLEDs</b>             | <b>Organic light-emitting diodes</b>                               |
| <b>EQE<sub>max</sub></b> | <b>Maximum external quantum efficiency</b>                         |

---

---

|                                 |                                                                      |
|---------------------------------|----------------------------------------------------------------------|
| <b>ECL</b>                      | <b>Electrogenerated chemiluminescence</b>                            |
| <b>PDT</b>                      | <b>Photodynamic therapy</b>                                          |
| <b>TTA-UC</b>                   | <b>Triplet-triplet-annihilation upconversion</b>                     |
| <b>3D</b>                       | <b>Three-dimensional</b>                                             |
| <b>SN<sub>Ar</sub></b>          | <b>Aromatic nucleophilic substitution</b>                            |
| <b>SE<sub>Ar</sub></b>          | <b>Aromatic electrophilic substitution</b>                           |
| <b>PLQY</b>                     | <b>Photoluminescence quantum yield</b>                               |
| <b>DGs</b>                      | <b>Directing groups</b>                                              |
| <b>LG</b>                       | <b>Leaving group</b>                                                 |
| <b>M</b>                        | <b>Metal</b>                                                         |
| <b>R. T.</b>                    | <b>Room temperature</b>                                              |
| <b>AIDF</b>                     | <b>Aggregation-induced delayed fluorescence</b>                      |
| <b><math>\theta_{//}</math></b> | <b>Horizontal dipole ratio</b>                                       |
| <b>RTP</b>                      | <b>Room temperature phosphorescence</b>                              |
| <b>EWG</b>                      | <b>Electron-withdrawing group</b>                                    |
| <b>MCL</b>                      | <b>Mechanochromic luminescence</b>                                   |
| <b>CD</b>                       | <b>Circular dichroism</b>                                            |
| <b>CPL</b>                      | <b>Circularly polarized luminescence</b>                             |
| <b>CPEL</b>                     | <b>Circularly polarized electroluminescence</b>                      |
| <b>CPPL</b>                     | <b>Circularly polarized photoluminescence</b>                        |
| <b><math>g_{EL}</math></b>      | <b>Circularly polarized electroluminescent dissymmetry factor</b>    |
| <b>CP-TADF</b>                  | <b>Circularly polarized thermally activated delayed fluorescence</b> |

---

---

|                   |                                                                                             |
|-------------------|---------------------------------------------------------------------------------------------|
| <b>CP-MR-TADF</b> | <b>Circularly polarized multiple-resonance<br/>thermally activated delayed fluorescence</b> |
| <b>EL</b>         | <b>Electroluminescence</b>                                                                  |
| <b>PL</b>         | <b>Photoluminescence</b>                                                                    |
| <b>MCz</b>        | <b>1-Methylcarbazole</b>                                                                    |
| $\theta_{DA}$     | <b>Torsion angle between donor and acceptor</b>                                             |
| $\tau_d$          | <b>Lifetime of delayed fluorescence</b>                                                     |
| <b>TSCT</b>       | <b>Through-space charge transfer</b>                                                        |
| <b>SRCT</b>       | <b>Short-range charge transfer</b>                                                          |
| <b>LRCT</b>       | <b>Long-range charge transfer</b>                                                           |
| <b>DFT</b>        | <b>Density functional theory</b>                                                            |
| $E_{HOMO}$        | <b>HOMO energy level</b>                                                                    |
| <b>TSF</b>        | <b>TADF-sensitized fluorescence</b>                                                         |
| <b>TST</b>        | <b>TADF-sensitized TADF</b>                                                                 |

---

Table S2 List of abbreviations of reagents and building blocks used in this review

| Abbreviations                         | Full meaning                                 | Abbreviations                                      | Full meaning                                                                |
|---------------------------------------|----------------------------------------------|----------------------------------------------------|-----------------------------------------------------------------------------|
| Pd(OAc) <sub>2</sub>                  | Palladium(II) acetate                        | Pd(PPh <sub>3</sub> ) <sub>2</sub> Cl <sub>2</sub> | Bis(triphenylphosphine)palladium(II) dichloride                             |
| AgOAc                                 | Silver(I) acetate                            | ICz                                                | Indolo[3,2,1- <i>jk</i> ]carbazole                                          |
| NBS                                   | <i>N</i> -Bromosuccinimide                   | PAH                                                | Polycyclic aromatic hydrocarbons                                            |
| PTSA                                  | <i>p</i> -Toluenesulfonic acid               | MeIac                                              | 12 <i>b</i> -Methyl-5,12 <i>b</i> -dihydroindeno[1,2,3- <i>kl</i> ]acridine |
| <i>o</i> -DCB                         | 1,2-Dichlorobenzene                          | DMSO                                               | Dimethyl sulfoxide                                                          |
| RuCl <sub>3</sub>                     | Ruthenium(III) chloride                      | dppf                                               | Bis(diphenylphosphino)ferrocene                                             |
| DBU                                   | 1,8-Diazabicyclo[5.4.0]undec-7-ene           | Pd(dba) <sub>2</sub>                               | Bis(dibenzylideneacetone)palladium(0)                                       |
| DME                                   | 1,2-Dimethoxyethane                          | P( <i>o</i> -tolyl) <sub>3</sub>                   | Tri( <i>o</i> -tolyl)phosphine                                              |
| K <sub>2</sub> CO <sub>3</sub>        | Potassium(II) carbonate                      | CsF                                                | Cesium(I) fluoride                                                          |
| MeI                                   | Methyl iodide                                | CH <sub>3</sub> CN                                 | Acetonitrile                                                                |
| Rh(PPh <sub>3</sub> ) <sub>3</sub> Cl | Rhodium(I) tris(triphenylphosphine) chloride | CH <sub>2</sub> Cl <sub>2</sub>                    | Dichloromethane                                                             |
| MnO <sub>2</sub>                      | Manganese(IV) dioxide                        | CF <sub>3</sub> COOH                               | Trifluoroacetic acid                                                        |

---

|                                                      |                                                |                           |                                                                                 |
|------------------------------------------------------|------------------------------------------------|---------------------------|---------------------------------------------------------------------------------|
| Zn(OAc) <sub>2</sub>                                 | Zinc(II) acetate                               | [Ir(COD)OMe] <sub>2</sub> | (1,5-Cyclooctadiene)(methoxy)iridium(I) dimer                                   |
| PhCl                                                 | Chlorobenzene                                  | dtbpy                     | 4,4'-Di- <i>tert</i> -butyl-2,2'-bipyridine                                     |
| [Ru( <i>p</i> -cymene)Cl <sub>2</sub> ] <sub>2</sub> | Dichloro( <i>p</i> -cymene)ruthenium(II) dimer | (BPin) <sub>2</sub>       | 4,4,5,5-Tetramethyl-2-(tetramethyl-1,3,2-dioxaborolan-2-yl)-1,3,2-dioxaborolane |
| PCy <sub>3</sub>                                     | Tricyclohexyl phosphine                        | HBPIn                     | 4,4,5,5-Tetramethyl-1,3,2-dioxaborolane                                         |
| NaHCO <sub>3</sub>                                   | Sodium(I) bicarbonate                          | Czp                       | Carbazolophane, indolo[2.2]paracyclophane                                       |
| DMF                                                  | <i>N,N</i> -Dimethylformamide                  | CuCl                      | Cuprous(I) chloride                                                             |
| TfOH                                                 | Trifluoromethanesulfonic acid                  | KOH                       | Potassium(I) hydroxide                                                          |
| AgSbF <sub>6</sub>                                   | Silver(I) hexafluoroantimonate                 | BICOL                     | Bicarbazolediol                                                                 |
| PivOH                                                | Pivalic acid                                   | VO(OAc) <sub>2</sub>      | Vanadium(IV) acetate                                                            |
| DCE                                                  | 1,2-Dichloroethane                             | BDMac                     | 9,9,9',9'-tetramethyl-9,10-dihydro-9' <i>H</i> -2,10'-biacridine                |
| Pd(acac) <sub>2</sub>                                | Palladium(II) acetylacetonate                  | DCM                       | Dichloromethane                                                                 |
| NaOAc                                                | Sodium(I) acetate                              | bpy                       | <i>o</i> -Phenanthroline                                                        |
| [Cp* <i>Rh</i> Cl <sub>2</sub> ] <sub>2</sub>        | Dichloropentamethylcyclopentadiene             | [Ru-                      | Dichlorodi- <i>μ</i> -                                                          |

---

---

|                                                |                                                         |                                              |                                                                                                                                                 |
|------------------------------------------------|---------------------------------------------------------|----------------------------------------------|-------------------------------------------------------------------------------------------------------------------------------------------------|
|                                                | ylrhodium(III) dimer                                    | complex6] <sub>2</sub>                       | chlorobis[(1,2,3,6,7,8-η-2,7-<br>dimethyl-2,6-octadiene-1,8-<br>diyl]diruthenium(IV)                                                            |
| Cu(OAc) <sub>2</sub>                           | Copper(II) acetate                                      | PhCl                                         | Chlorobenzene                                                                                                                                   |
| Zn(OTf) <sub>2</sub>                           | Zinc(II) trifluoromethanesulfonate                      | CH <sub>3</sub> COOH                         | Acetic acid                                                                                                                                     |
| AgOTf                                          | Silver(I) trifluoromethanesulfonate                     | C <sub>2</sub> Cl <sub>4</sub>               | Tetrachloroethene                                                                                                                               |
| Ag <sub>2</sub> O                              | Silver(I) oxide                                         | DCz                                          | 3,3',6,6'-tetra- <i>tert</i> -butyl-9 <i>H</i> -<br>1,9'-bicarbazole                                                                            |
| Na <sub>2</sub> HPO <sub>4</sub>               | Sodium(I) dihydrogen phosphate                          | BBr <sub>3</sub>                             | Boron tribromide                                                                                                                                |
| HFIP                                           | Hexafluoroisopropanol                                   | DIPEA                                        | Diisopropylethylamine                                                                                                                           |
| THF                                            | Tetrahydrofuran                                         | Et <sub>3</sub> N                            | Triethylamine                                                                                                                                   |
|                                                |                                                         |                                              | <i>N</i> <sup>1</sup> , <i>N</i> <sup>1</sup> , <i>N</i> <sup>3</sup> , <i>N</i> <sup>3</sup> , <i>N</i> <sup>5</sup> , <i>N</i> <sup>5</sup> - |
| CuI                                            | Cuprous(I) iodide                                       | PA                                           | hexaphenylbenzene-1,3,5-<br>triamine                                                                                                            |
| Phen                                           | 1,10-Phenanthroline                                     | 1,2,4-TCB                                    | 1,2,4-Trichlorobenzene                                                                                                                          |
| K <sub>3</sub> PO <sub>4</sub>                 | Potassium(I) phosphate                                  | BI <sub>3</sub>                              | Boron triiodide                                                                                                                                 |
| K <sub>2</sub> CO <sub>3</sub>                 | Potassium(I) carbonate                                  | BPh <sub>3</sub>                             | Triphenylboron                                                                                                                                  |
| PPh <sub>3</sub>                               | Triphenylphosphine                                      | dtpy                                         | 2,6-Di- <i>tert</i> -butylpyridine                                                                                                              |
| Ag <sub>2</sub> CO <sub>3</sub>                | Silver(I) carbonate                                     | K <sub>2</sub> S <sub>2</sub> O <sub>8</sub> | Potassium(I) persulfate                                                                                                                         |
| <sup>t</sup> Bu <sub>3</sub> PHBF <sub>4</sub> | Tri- <i>tert</i> -butylphosphonium<br>tetrafluoroborate | TBAB                                         | Tetrabutylammonium<br>bromide                                                                                                                   |
| MCz                                            | 1-methyl-9 <i>H</i> -carbazole                          | TBHP                                         | <i>tert</i> -Butyl hydroperoxide                                                                                                                |

---



---

|                                                    |                                                                                             |                       |                                                                     |
|----------------------------------------------------|---------------------------------------------------------------------------------------------|-----------------------|---------------------------------------------------------------------|
| DMCz                                               | 1,8-dimethyl-9H-carbazole                                                                   | <sup>t</sup> BuPh     | <i>tert</i> -Butylbenzene                                           |
| TMCz                                               | 1,3,6,8-tetramethyl-9H-carbazole                                                            | I <sub>2</sub>        | Iodine                                                              |
| Cy <sub>3</sub> PHBF <sub>4</sub>                  | Tricyclohexylphosphine<br>tetrafluoroborate                                                 | Se                    | Selenium(0)                                                         |
| Tol                                                | Toluene                                                                                     | SeO <sub>2</sub>      | Selenium(IV) dioxide                                                |
| Pd-PCy <sub>3</sub> -G3                            | Methanesulfonato(tricyclohexylphos-<br>phine)(2'-amino-1,1'-biphenyl-2-<br>yl)palladium(II) | LDA                   | Lithium(I) diisopropylamide                                         |
| DMA                                                | <i>N,N</i> -Dimethylacetamide                                                               | DMPU                  | 1,3-Dimethyl-3,4,5,6-<br>tetrahydro-2(1 <i>H</i> )-<br>pyrimidinone |
| IPr-HCl                                            | 1,3-bis(2,6-di- <i>i</i> -propylphenyl)<br>imidazolium chloride                             | TXO                   | Thioxanthone                                                        |
| Pd <sub>2</sub> (dba) <sub>3</sub>                 | Tris(dibenzylideneacetone)dipalladi-<br>um(0)                                               | TsOH·H <sub>2</sub> O | <i>p</i> -Toluenesulfonic acid<br>monohydrate                       |
| XPhos                                              | 2-dicyclohexylphosphino-2',4',6'-<br>triisopropylbiphenyl                                   | KI                    | Potassium(I) iodide                                                 |
| P <sup>t</sup> Bu <sub>3</sub>                     | Tri- <i>tert</i> -butylphosphine                                                            | DCP                   | Dicumyl peroxide                                                    |
| TFE                                                | 2,2,2-trifluoroethanol                                                                      | SpA                   | Spiro-acridan                                                       |
| Pd(PCy <sub>3</sub> ) <sub>2</sub> Cl <sub>2</sub> | Bis(tricyclohexylphosphine)palladiu-<br>m(II) dichloride                                    |                       |                                                                     |

---

Table S3 Summary of photophysical properties and device performance of TADF emitters synthesized from directing group-involved C–H bond activation

| Compound                      | $\lambda_{\text{FL}}^{\text{a}}$<br>[nm] | PLQY <sup>b</sup><br>[%] | $\tau_{\text{d}}^{\text{c}}$<br>[ $\mu\text{s}$ ] | $\Delta E_{\text{ST}}^{\text{d}}$<br>[eV] | $\lambda_{\text{EL}}^{\text{e}}$<br>[nm] | EQE <sub>max</sub> <sup>f</sup><br>[%] | CIE <sup>g</sup><br>(x, y) | Ref. |
|-------------------------------|------------------------------------------|--------------------------|---------------------------------------------------|-------------------------------------------|------------------------------------------|----------------------------------------|----------------------------|------|
| <i>o</i> PTC                  | 455                                      | 47                       | 57.9                                              | 0.02                                      | 500                                      | 19.9                                   | (0.22, 0.40)               | [70] |
| <i>o</i> PTBC                 | 561                                      | 58                       | 4.6                                               | 0.007                                     | 540                                      | 17.8                                   | (0.35, 0.56)               | [72] |
| <i>o</i> AcTBC                | 509                                      | 84                       | 17.4                                              | 0.034                                     | 512                                      | 20.9                                   | (0.23, 0.53)               | [73] |
| <i>o</i> SpTBC                | 497                                      | 93                       | 16.9                                              | 0.023                                     | 508                                      | 26.8                                   | (0.21, 0.49)               | [73] |
| DMAC-BPI                      | 510                                      | 96                       | 3.3                                               | 0.02                                      | 508                                      | 24.7                                   | (0.24, 0.49)               | [77] |
| DPAC-BPI                      | 472                                      | 11                       | 27                                                | 0.15                                      | -                                        | -                                      | -                          | [78] |
| DPAC-BPI-CN                   | 525                                      | 90                       | 3.0                                               | 0.07                                      | 531                                      | 26.2                                   | (0.24, 0.49)               | [78] |
| TMCzSe                        | 488                                      | 86                       | 26.7                                              | 0.09                                      | 494                                      | 25.5                                   | (0.21, 0.46)               | [80] |
| PXZ-ICO                       | 564                                      | 17                       | 343                                               | 0.14                                      | -                                        | -                                      | -                          | [85] |
| 5a                            | 573                                      | 3                        | 7.2                                               | -                                         | -                                        | -                                      | -                          | [86] |
| DMAC-2,3- <i>c</i> -<br>BTIQO | 456                                      | -                        | 11.4                                              | 0.12                                      | 474                                      | 25.4                                   | (0.15, 0.23)               | [87] |
| 7a                            | 425                                      | 26                       | 14.6                                              |                                           |                                          |                                        | -                          | [88] |
| 7b                            | 450                                      | 10                       | 24.7                                              |                                           |                                          |                                        | -                          | [88] |

(a) The peak wavelength ( $\lambda_{\text{PL}}$ ) of fluorescent spectra, (b) photoluminescence quantum yields (PLQY), (c) lifetime of delayed fluorescence ( $\tau_{\text{d}}$ ), (d) energy gap ( $\Delta E_{\text{ST}}$ ) between singlet ( $S_1$ ) and triplet ( $T_1$ ) excited states in solution or film state. (e) The peak wavelength ( $\lambda_{\text{EL}}$ ) of electroluminescent spectra, (f) maximum external quantum efficiency (EQE<sub>max</sub>), and (g) Commission Internationale de L'Eclairage (CIE) coordinate of electroluminescence.

Table S4 Summary of photophysical properties and device performance of TADF emitters synthesized from electron-deficient arene C–H bond activation

| Compound              | $\lambda_{\text{FL}}^{\text{a}}$<br>[nm] | PLQY <sup>b</sup><br>[%] | $\tau_{\text{d}}^{\text{c}}$<br>[ $\mu\text{s}$ ] | $\Delta E_{\text{ST}}^{\text{d}}$<br>[eV] | $\lambda_{\text{EL}}^{\text{e}}$<br>[nm] | $\text{EQE}_{\text{max}}^{\text{f}}$<br>[%] | CIE <sup>g</sup><br>(x, y) | Ref. |
|-----------------------|------------------------------------------|--------------------------|---------------------------------------------------|-------------------------------------------|------------------------------------------|---------------------------------------------|----------------------------|------|
| 5CzDPhCF <sub>3</sub> | 431                                      | 27                       | 0.14                                              | 0.23                                      | 431                                      | 2.0                                         | (0.16, 0.07)               | [91] |
| 2                     | 507                                      | 89                       | 9.8                                               | 0.05                                      | 512                                      | 18.2                                        | (0.25, 0.53)               | [93] |
| CNCN                  | 480                                      | 50                       | 1.74                                              | 0.017                                     | 468                                      | 18.3                                        | (0.15, 0.17)               | [96] |
| CNCF <sub>3</sub>     | 470                                      | 39                       | 0.96                                              | 0.025                                     | 471                                      | 6.6                                         | (0.18, 0.26)               | [96] |
| CNCOA                 | 483                                      | 37                       | 2.06                                              | 0.015                                     | 495                                      | 5.6                                         | (0.22, 0.40)               | [96] |
| CNCOAM                | 472                                      | 44                       | 1.76                                              | 0.015                                     | 457                                      | 14.1                                        | (0.15, 0.13)               | [96] |
| 2-PXZ-PRB             | 504                                      | 25                       | 58.5                                              | 0.34                                      | 518                                      | 13.6                                        | -                          | [98] |
| 6-PXZ-PRB             | 535                                      | 38                       | 48.1                                              | 0.21                                      | 550                                      | 15.5                                        | -                          | [98] |
| 8-PXZ-PRB             | 522                                      | 27                       | 43.4                                              | 0.29                                      | 530                                      | 11.1                                        | -                          | [98] |

(a) The  $\lambda_{\text{PL}}$ , (b) PLQY, (c)  $\tau_{\text{d}}$ , and (d)  $\Delta E_{\text{ST}}$  value in solution or film state. (e) The  $\lambda_{\text{EL}}$ , (f)  $\text{EQE}_{\text{max}}$ , and (g) CIE coordinate of electroluminescence.

Table S5 Summary of photophysical properties and device performance of carbazole derivatives

(from *ortho*-halodiarylamines intramolecular C–H arylation)-based TADF emitters

| Compound        | $\lambda_{\text{FL}}^{\text{a}}$<br>[nm] | PLQY <sup>b</sup><br>[%] | $\tau_{\text{d}}^{\text{c}}$<br>[ $\mu\text{s}$ ] | $\Delta E_{\text{ST}}^{\text{d}}$<br>[eV] | $\lambda_{\text{EL}}^{\text{e}}$<br>[nm] | EQE <sub>max</sub> <sup>f</sup><br>[%] | CIE <sup>g</sup><br>(x, y) | Ref.  |
|-----------------|------------------------------------------|--------------------------|---------------------------------------------------|-------------------------------------------|------------------------------------------|----------------------------------------|----------------------------|-------|
| MCz-TRZ         | 435                                      | 51.3                     | 24.8                                              | 0.23                                      | 450                                      | 13.1                                   | (0.15, 0.11)               | [100] |
| MCz-PM          | 420                                      | 42.1                     | 159.9                                             | 0.21                                      | 458                                      | 7.5                                    | (0.17, 0.18)               | [100] |
| MCz-XT          | 466                                      | 86                       | 11.3                                              | 0.04                                      | 460                                      | 24.0                                   | (0.15, 0.15)               | [102] |
| 2MCz-XT         | 483                                      | 91                       | 1.0                                               | 0.01                                      | 482                                      | 32.1                                   | (0.17, 0.30)               | [102] |
| CzBP-1M         | -                                        | 32.3                     | 94                                                | 0.12                                      | -                                        | -                                      | -                          | [103] |
| CzBP-2M         | -                                        | 1.2                      | 63                                                | 0.11                                      | -                                        | -                                      | -                          | [103] |
| TAZ-1           | 468                                      | 88                       | 8.4                                               | 0.15                                      | 478                                      | 17.7                                   | (0.16, 0.25)               | [104] |
| TAZ-2           | 476                                      | 100                      | 6.6                                               | 0.10                                      | 479                                      | 21.2                                   | (0.16, 0.27)               | [104] |
| QBO             | 455                                      | 83                       | 0.65                                              | 0.01                                      | 460                                      | 20.5                                   | (0.14, 0.12)               | [105] |
| QXT             | 489                                      | 96                       | 0.97                                              | 0.02                                      | 481                                      | 24.9                                   | (0.16, 0.30)               | [105] |
| 4               | 443                                      | 86                       | 3.49                                              | 0.12                                      | -                                        | 13.3                                   | (0.14, 0.16)               | [106] |
| Cz-TRZ2         | 465                                      | 98                       | 3.5                                               | 0.07                                      | -                                        | 22.0                                   | -                          | [107] |
| CF <sub>3</sub> | 450                                      | 36                       | 0.19/3.1                                          | 0.07                                      | -                                        | -                                      | -                          | [108] |
| tmCzAZB         | 451                                      | 56                       | 162.4                                             | 0.26                                      | 464                                      | 12.4                                   | (0.14, 0.15)               | [109] |
| TMCzSe          | 488                                      | 85.9                     | 26.7                                              | 0.09                                      | 497                                      | 25.5                                   | (0.21, 0.46)               | [80]  |
| MCz-XT          | 478                                      | 98                       | 1.20                                              | 0.011                                     | 485                                      | 11.1                                   | -                          | [110] |
| MCz-BS          | 476                                      | 92                       | 1.9                                               | 0.11                                      | 478                                      | 21.6                                   | (0.14, 0.26)               | [111] |
| TMCz-BO         | 467                                      | 98                       | 0.75                                              | 0.020                                     | 471                                      | 20.7                                   | (0.14, 0.28)               | [112] |

---

|                            |     |      |       |       |     |      |              |       |
|----------------------------|-----|------|-------|-------|-----|------|--------------|-------|
| TMCz-3P                    | 477 | 76   | 14.5  | 0.134 | 479 | 20.4 | (0.14, 0.26) | [112] |
| MCz-BSBS                   | 476 | 100  | 0.78  | 0.01  | 473 | 20.1 | (0.13, 0.20) | [113] |
| MCz-BOBO                   | 483 | 93   | 2.7   | 0.17  | 484 | 25.9 | (0.14, 0.33) | [113] |
| MCz-TXT                    | 490 | 92   | 0.75  | 0.030 | 497 | 25.8 | (0.21, 0.46) | [114] |
| MCz-XT                     | 482 | 95   | 0.94  | 0.010 | 489 | 25.5 | (0.19, 0.42) | [114] |
| TMCzBCO                    | 520 | 84   | 0.99  | 0.007 | 532 | 24.7 | (0.33, 0.59) | [115] |
| TMCz-DMTD                  | 430 | 57.7 | 2.6   | 0.12  | 448 | 8.7  | (0.16, 0.11) | [116] |
| 1                          | 493 | 92   | 6.8   | 0.02  | 494 | 20.9 | (0.20, 0.42) | [117] |
| TMCz-DiKTa                 | 501 | 76   | 22    | 0.08  | 527 | 20.2 | (0.32, 0.60) | [118] |
| 3TMCz-DiKTa                | 577 | 18   | 3.0   | 0.01  | -   | -    | -            | [118] |
| TCz-TRZ                    | 457 | 77   | 38    | 0.27  | 456 | 10.4 | (0.16, 0.14) | [119] |
| TCz-TRZ(Me)                | 451 | 60   | 51    | 0.16  | 448 | 11.1 | (0.17, 0.18) | [119] |
| TCz-TRZ(Me')               | 444 | 80   | 58    | 0.12  | 450 | 0.7  | (0.20, 0.23) | [119] |
| TCz-TRZ(Me <sub>2</sub> p) | 442 | 46   | 39    | 0.14  | 447 | 0.9  | (0.20, 0.21) | [119] |
| TCz-TRZ(Me <sub>2</sub> o) | 435 | 47   | 37    | 0.18  | 444 | 2.8  | (0.23, 0.29) | [119] |
| IDAC-MCO                   | 498 | 81   | 22    | 0.09  | 516 | 18.0 | (0.28, 0.48) | [120] |
| IDAC-TRZ                   | 533 | 90   | 13    | 0.02  | 540 | 20.5 | (0.36, 0.55) | [120] |
| CNCzpPhTRZ                 | 458 | 65   | 135.0 | 0.23  | 456 | 7.4  | (0.19, 0.18) | [121] |
| CF <sub>3</sub> CzpPhTRZ   | 456 | 70   | 158.3 | 0.22  | 460 | 11.6 | (0.19, 0.20) | [121] |
| DCzpTRZtBu                 | 455 | 41   | -     | 0.115 | 475 | 3.2  | (0.17, 0.26) | [122] |
| dtBuCzDCzpTRZtBu           | 455 | 37   | 9.7   | 0.110 | 478 | 4.0  | (0.19, 0.30) | [122] |
| dMeOCzDCzpTRZtBu           | 490 | 41   | 7.7   | 0.070 | 515 | 8.2  | (0.24, 0.50) | [122] |

---

|                                   |     |      |       |      |     |      |              |       |
|-----------------------------------|-----|------|-------|------|-----|------|--------------|-------|
| B <sup>2</sup> TPNF <sub>2</sub>  | 527 | 29   | 2.17  | 0.00 | -   | -    | -            | [123] |
| B <sup>2</sup> CNPyF <sub>2</sub> | 488 | 23   | 1.84  | 0.22 | -   | -    | -            | [123] |
| ( <i>R</i> )-Czp- <i>t</i> BuCzB  | 478 | 98   | 41.8  | 0.09 | 479 | 32.1 | (0.11, 0.21) | [124] |
| ( <i>R</i> )-Czp-POAB             | 498 | 96   | 62.4  | 0.13 | 513 | 28.7 | (0.23, 0.65) | [124] |
| BN-DICz                           | 533 | 99.4 | 495.9 | 0.26 | 541 | 31.5 | (0.30, 0.58) | [125] |

(a) The  $\lambda_{\text{PL}}$ , (b) PLQY, (c)  $\tau_{\text{d}}$ , and (d)  $\Delta E_{\text{ST}}$  value in solution or film state. (e) The  $\lambda_{\text{EL}}$ , (f)  $\text{EQE}_{\text{max}}$ , and (g) CIE coordinate of electroluminescence.

Table S6 Summary of photophysical properties and device performance of carbazole derivatives  
(from *ortho*-halogenated phenyl carbazole intramolecular C–H arylation)-based TADF emitters

| Compound              | $\lambda_{\text{FL}}^{\text{a}}$<br>[nm] | PLQY <sup>b</sup><br>[%] | $\tau_{\text{d}}^{\text{c}}$<br>[ $\mu\text{s}$ ] | $\Delta E_{\text{ST}}^{\text{d}}$<br>[eV] | $\lambda_{\text{EL}}^{\text{e}}$<br>[nm] | EQE <sub>max</sub> <sup>f</sup><br>[%] | CIE <sup>g</sup><br>(x, y) | FWHM <sup>h</sup> | Ref.  |
|-----------------------|------------------------------------------|--------------------------|---------------------------------------------------|-------------------------------------------|------------------------------------------|----------------------------------------|----------------------------|-------------------|-------|
| tBisICz               | 442                                      | 95                       | 12500                                             | 0.29                                      | 445                                      | 15.1                                   | (0.16, 0.05)               | 22                | [143] |
| tPBisICz              | 450                                      | 91                       | 1740                                              | 0.27                                      | 452                                      | 23.1                                   | (0.15, 0.05)               | 21                | [143] |
| DiICzMes <sub>4</sub> | 451                                      | 82                       | 433                                               | 0.26                                      | 446                                      | 16.5                                   | (0.15, 0.11)               | -                 | [144] |
| 10a                   | 502                                      | 17                       | 3.6                                               | 0.26                                      | -                                        | -                                      | -                          | -                 | [145] |
| 10b                   | 519                                      | 45                       | 3.5                                               | 0.15                                      | -                                        | -                                      | -                          | -                 | [145] |
| 10c                   | 505                                      | 16                       | 1.6                                               | 0.28                                      | -                                        | -                                      | -                          | -                 | [145] |
| 10e                   | 519                                      | 37                       | 1.6                                               | 0.29                                      | -                                        | -                                      | -                          | -                 | [145] |
| 10f                   | 617                                      | 86                       | 1.0                                               | -0.35                                     | -                                        | 10                                     | -                          | -                 | [145] |
| 10h                   | 507                                      | 37                       | 1.6                                               | 0.29                                      | -                                        | 12                                     | -                          | -                 | [145] |
| 10i                   | 517                                      | 9                        | 1.2                                               | 0.12                                      | -                                        | -                                      | -                          | -                 | [145] |
| 10j                   | 500                                      | 19                       | 13.0                                              | 0.24                                      | -                                        | -                                      | -                          | -                 | [145] |
| 10k                   | 508                                      | 19                       | 1.8                                               | 0.25                                      | -                                        | -                                      | -                          | -                 | [145] |
| 10l                   | 500                                      | 16                       | 1.3                                               | 0.27                                      | -                                        | -                                      | -                          | -                 | [145] |
| 10m                   | 503                                      | 17                       | 0.79                                              | 0.37                                      | -                                        | -                                      | -                          | -                 | [145] |
| 10n                   | 532                                      | 30                       | 0.86                                              | 0.26                                      | -                                        | -                                      | -                          | -                 | [145] |
| VTCzBN                | 496                                      | 98                       | 9.9                                               | 0.06                                      | 499                                      | 31.7                                   | (0.14, 0.56)               | 38                | [147] |
| TCz-VTCzBN            | 521                                      | 98                       | 8.7                                               | < 0.01                                    | 524                                      | 32.2                                   | (0.22, 0.71)               | 37                | [147] |

|         |     |    |     |      |     |      |              |   |       |
|---------|-----|----|-----|------|-----|------|--------------|---|-------|
| IPzIDCz | 525 | 76 | 2.9 | 0.07 | 531 | 23.9 | (0.37, 0.57) | - | [148] |
| ImIDCz  | 478 | 51 | 704 | -    | -   | -    | -            | - | [148] |

(a) The  $\lambda_{\text{PL}}$ , (b) PLQY, (c)  $\tau_{\text{d}}$ , and (d)  $\Delta E_{\text{ST}}$  value in solution or film state. (e) The  $\lambda_{\text{EL}}$ , (f)  $\text{EQE}_{\text{max}}$ , (g) CIE coordinate, and (h) FWHM of electroluminescence.



Table S7 Summary of photophysical properties and device performance of TADF emitters accessed from dehalogenated C–H arylation with forming 5/6-membered carbon ring

| Compound         | $\lambda_{\text{FL}}^{\text{a}}$<br>[nm] | PLQY <sup>b</sup><br>[%] | $\tau_{\text{d}}^{\text{c}}$<br>[ $\mu\text{s}$ ] | $\Delta E_{\text{ST}}^{\text{d}}$<br>[eV] | $\lambda_{\text{EL}}^{\text{e}}$<br>[nm] | EQE <sub>max</sub> <sup>f</sup><br>[%] | CIE <sup>g</sup><br>(x, y) | Ref.  |
|------------------|------------------------------------------|--------------------------|---------------------------------------------------|-------------------------------------------|------------------------------------------|----------------------------------------|----------------------------|-------|
| DMAC-SFNP        | 545                                      | -                        | 88.6                                              | 0.27                                      | -                                        | 32.2                                   | -                          | [149] |
| DMAC-<br>tBuSFNP | 540                                      | -                        | 53.7                                              | 0.32                                      | -                                        | 18.5                                   | -                          | [149] |
| DBCP             | 557                                      | 89                       | 30.0                                              | 0.10                                      | 544                                      | 20.2                                   | (0.38,<br>0.57)            | [151] |
| CNTP-DMAC        | ~470                                     | 58                       | 41                                                | 0.34                                      | ~480                                     | 15.6                                   | (0.18,<br>0.30)            | [153] |
| TRZ-MeIAc        | 473                                      | 89                       | 82.3                                              | 0.19                                      | 494                                      | 20.3                                   | (0.18,<br>0.38)            | [155] |
| NID-MeIAc        | 565                                      | 86                       | 235.4                                             | 0.22                                      | 589                                      | 23.7                                   | (0.53,<br>0.47)            | [155] |
| BN-MeIAc         | 497                                      | 96                       | 28.1                                              | 0.11                                      | 504                                      | 37.2                                   | (0.12,<br>0.63)            | [157] |
| 37 + $\pi$       | 529                                      | 74                       | 1.1/3.3                                           |                                           | -                                        | -                                      | -                          | [158] |
| 38 + $\pi$       | 519                                      | 49                       | 0.41/1.7                                          |                                           | -                                        | -                                      | -                          | [158] |
| IT-TRZ           | 505                                      | 98                       | 2.2                                               | 0.03                                      | -                                        | 35.8                                   | -                          | [159] |
| 2S-TRZ           | 507                                      | 99                       | 2.4                                               | 0.03                                      | -                                        | 32.6                                   | -                          | [159] |

(a) The  $\lambda_{\text{PL}}$ , (b) PLQY, (c)  $\tau_{\text{d}}$ , and (d)  $\Delta E_{\text{ST}}$  value in solution or film state. (e) The  $\lambda_{\text{EL}}$ , (f) EQE<sub>max</sub>, and (g) CIE coordinate of electroluminescence.

Table S8 Summary of photophysical properties and device performance of TADF emitters from Ir-catalyzed C–H borylation

| Compound                      | $\lambda_{FL}^a$<br>[nm] | PLQY <sup>b</sup><br>[%] | $\tau_d^c$<br>[ $\mu$ s] | $\Delta E_{ST}^d$<br>[eV] | $\lambda_{EL}^e$<br>[nm] | EQE <sub>max</sub> <sup>f</sup><br>[%] | CIE <sup>g</sup><br>(x, y) | FWHM <sup>h</sup><br>(nm) | Ref.  |
|-------------------------------|--------------------------|--------------------------|--------------------------|---------------------------|--------------------------|----------------------------------------|----------------------------|---------------------------|-------|
| Phox-Me $\pi$                 | 568                      | 65                       | 1.3                      | 0.04                      | -                        | -                                      | -                          | -                         | [169] |
| Phox-MeO $\pi$                | 598                      | 40                       | 1.6                      | 0.03                      | -                        | -                                      | -                          | -                         | [169] |
| MeO <sub>3</sub> Ph-FMe $\pi$ | 477                      | 85                       | 5.5                      | 0.03                      | -                        | -                                      | -                          | -                         | [169] |
| poly(DMTPA-<br>DCB)           | 512                      | 64                       | 0.7                      | 0.22                      | -                        | -                                      | -                          | -                         | [171] |
| poly(TMTPA-<br>DCB)           | 532                      | 96                       | 2.3                      | 0.09                      | -                        | 24.0                                   | (0.34, 0.57)               | -                         | [171] |
| CNQxP-BDT-<br>TIPS            | -                        | -                        | 1860                     | 0.18                      | -                        | -                                      | -                          | -                         | [173] |
| DTPz-BDT-<br>TIPS             | -                        | 1                        | 26000                    | 0.40                      | -                        | -                                      | -                          | -                         | [174] |
| DtCzB-DPTRZ                   | 507                      | 94                       | 787.5                    | 0.18                      | 532                      | 24.6                                   | (0.33, 0.63)               | 39                        | [176] |
| DtCzB-TPTRZ                   | 477                      | 97                       | 83.5                     | 0.11                      | 516                      | 29.8                                   | (0.18, 0.67)               | 38                        | [176] |
| DtCzB-PPm                     | 474                      | 96                       | 86.5                     | 0.11                      | 508                      | 28.6                                   | (0.16, 0.66)               | 33                        | [176] |
| DtCzB-CNPm                    | 481                      | 93                       | 524.3                    | 0.15                      | 540                      | 25.0                                   | (0.35, 0.63)               | 44                        | [176] |
| BN-CP1                        | 490                      | 93                       | 79.6                     | 0.12                      | 496                      | 40.0                                   | (0.09, 0.50)               | 25                        | [178] |
| BN-CP2                        | 490                      | 91                       | 83.6                     | 0.13                      | 497                      | 36.4                                   | (0.10, 0.53)               | 26                        | [178] |

|                               |     |    |      |           |     |      |              |    |       |
|-------------------------------|-----|----|------|-----------|-----|------|--------------|----|-------|
| S-Cz-BN                       | 490 | 94 | 69.6 | 0.15      | 488 | 30.5 | (0.12, 0.43) | 26 | [179] |
| D-Cz-BN                       | 490 | 98 | 76.0 | 0.13      | 488 | 37.2 | (0.11, 0.43) | 24 | [179] |
| SF3BN                         | 493 | 90 | 26.0 | 0.15      | 496 | 32.2 | (0.09, 0.52) | 30 | [180] |
| SF1BN                         | 493 | 93 | 9.5  | 0.13      | 492 | 35.9 | (0.08, 0.47) | 28 | [180] |
| BN-TP                         | 523 | 96 | 44   | 0.14      | 528 | 35.1 | (0.26, 0.70) | 36 | [181] |
| ( <i>R/S</i> )-OBN-<br>4CN-BN | 500 | 96 | 97.4 | 0.13      | 508 | 24.7 | (0.16, 0.66) | 33 | [182] |
| ( <i>R/S</i> )-OBN-<br>2CN-BN | 493 | 99 | 95.3 | 0.12      | 496 | 29.8 | (0.13, 0.53) | 33 | [182] |
| DCzBN-Au                      | 508 | 95 | 4.3  | 0.13      | 510 | 35.8 | (0.16, 0.67) | 34 | [183] |
| (IPr)AuBN                     | 515 | 92 | 5.5  | 0.08-0.09 | 509 | 24.0 | (0.16, 0.66) | 35 | [184] |
| (BzIPr)AuBN                   | 511 | 86 | 6.9  | 0.08-0.09 | 506 | 30.3 | (0.16, 0.68) | 34 | [184] |
| (PyIPr)AuBN                   | 511 | 93 | 7.3  | 0.08-0.09 | 515 | 24.0 | (0.22, 0.67) | 39 | [184] |
| (PzIPr)AuBN                   | 510 | 78 | 6.5  | 0.08-0.09 | 512 | 27.6 | (0.18, 0.69) | 37 | [184] |
| (BzIPr)AuBNO                  | 471 | 89 | 27.0 | 0.11      | -   | -    | -            | -  | [184] |
| BNCz-pTPA                     | 487 | 95 | 24.0 | 0.11      | 496 | 27.3 | (0.12, 0.54) | 34 | [185] |
| BNCz-mTPA                     | 489 | 92 | 29.4 | 0.12      | 496 | 24.6 | (0.11, 0.53) | 31 | [185] |
| BN-R                          | 624 | 94 | 71.8 | 0.11      | 617 | 22.0 | (0.66, 0.34) | 47 | [186] |

(a) The  $\lambda_{\text{PL}}$ , (b) PLQY, (c)  $\tau_{\text{d}}$ , and (d)  $\Delta E_{\text{ST}}$  value in solution or film state. (e) The  $\lambda_{\text{EL}}$ , (f) EQE<sub>max</sub>, (g) CIE coordinate, and (h) FWHM of electroluminescence.

Table S9 Summary of photophysical properties and device performance of TADF emitters from transition-metal-catalyzed oxidative couplings between C(sp<sup>2</sup>)-H and X-H bond

| Compound                          | $\lambda_{\text{FL}}^{\text{a}}$<br>[nm] | PLQY <sup>b</sup><br>[%] | $\tau_{\text{d}}^{\text{c}}$<br>[ $\mu\text{s}$ ] | $\Delta E_{\text{ST}}^{\text{d}}$<br>[eV] | $\lambda_{\text{EL}}^{\text{e}}$<br>[nm] | EQE <sub>max</sub> <sup>f</sup><br>[%] | CIE <sup>g</sup><br>(x, y) | Ref.  |
|-----------------------------------|------------------------------------------|--------------------------|---------------------------------------------------|-------------------------------------------|------------------------------------------|----------------------------------------|----------------------------|-------|
| SFI23pTz                          | 432                                      | 70                       | 97.2                                              | 0.40                                      | 476                                      | 17.3                                   | (0.15, 0.22)               | [191] |
| SFI23mTz                          | 451                                      | 35                       | 176.6                                             | 0.30                                      | 484                                      | 16.5                                   | (0.15, 0.27)               | [191] |
| SFI23pPm                          | 414                                      | 72                       | ~189                                              | 0.36                                      | -                                        | 5.1                                    | (0.15, 0.10)               | [192] |
| SF23oTz                           | 473                                      | 52                       | 4.3                                               | 0.08                                      | 484                                      | 19.6                                   | (0.19, 0.35)               | [193] |
| ( <i>S/R</i> )-CzpPhTRZ           | 470                                      | 70                       | 65                                                | 0.16                                      | 480                                      | 17.0                                   | (0.17, 0.25)               | [194] |
| B <sup>2</sup> TPNF <sub>2</sub>  | 527                                      | 29                       | 2.17                                              | 0.00                                      | -                                        | -                                      | -                          | [123] |
| B <sup>2</sup> CNPyF <sub>2</sub> | 488                                      | 23                       | 1.84                                              | 0.22                                      | -                                        | -                                      | -                          | [123] |
| 4hc                               | 460                                      | 6                        | -                                                 | 0.07                                      | -                                        | ~1.2                                   | -                          | [199] |
| 4ic                               | 466                                      | 7                        | -                                                 | 0.07                                      | -                                        | 1.5                                    | -                          | [199] |
| DPS-BDMAC                         | 481                                      | 69                       | 2.1                                               | 0.02                                      | 498                                      | 12.4                                   | (0.23, 0.40)               | [200] |
| TRZ-BDMAC                         | 510                                      | 87                       | 2.8                                               | 0.01                                      | 516                                      | 13.9                                   | (0.27, 0.51)               | [200] |
| BPO-BDMAC                         | 516                                      | 89                       | 3.0                                               | 0.03                                      | 522                                      | 22.5                                   | (0.29, 0.54)               | [200] |
| DCz-ND                            | 475                                      | 46                       | 6.0                                               | 0.12                                      | 469                                      | 18.1                                   | (0.15, 0.21)               | [204] |
| DCz-ND-Cz                         | 471                                      | 74                       | 4.4                                               | 0.13                                      | 468                                      | 20.8                                   | (0.16, 0.21)               | [204] |
| DCz-ND-DCz                        | 768                                      | 72                       | 7.0                                               | 0.13                                      | 464                                      | 20.8                                   | (0.16, 0.20)               | [204] |

(a) The  $\lambda_{\text{PL}}$ , (b) PLQY, (c)  $\tau_{\text{d}}$ , and (d)  $\Delta E_{\text{ST}}$  value in solution or film state. (e) The  $\lambda_{\text{EL}}$ , (f) EQE<sub>max</sub>, and (g) CIE coordinate of electroluminescence.

Table S10 Summary of photophysical properties and device performance of TADF emitters from directed C–H borylation

| Compound           | $\lambda_{\text{FL}}^{\text{a}}$<br>[nm] | PLQY <sup>b</sup><br>[%] | $\tau_{\text{d}}^{\text{c}}$<br>[ $\mu\text{s}$ ] | $\Delta E_{\text{ST}}^{\text{d}}$<br>[eV] | $\lambda_{\text{EL}}^{\text{e}}$<br>[nm] | EQE <sub>max</sub> <sup>f</sup><br>[%] | CIE <sup>g</sup><br>(x, y) | Ref.  |
|--------------------|------------------------------------------|--------------------------|---------------------------------------------------|-------------------------------------------|------------------------------------------|----------------------------------------|----------------------------|-------|
| fppyBTPA           | 494                                      | 72                       | 2.0                                               | ~0                                        | -                                        | 20.2                                   | -                          | [213] |
| dfppyBTPA          | 490                                      | 95                       | 2.4                                               | ~0                                        | -                                        | 26.6                                   | -                          | [213] |
| fppyBCzP           | 450                                      | 16                       | 0.29                                              | 0.24                                      | -                                        | -                                      | -                          | [213] |
| dfppyBCzP          | 455                                      | 15                       | 0.18                                              | -                                         | -                                        | -                                      | -                          | [213] |
| MeFAC-B            | 504                                      | 97                       | 0.06                                              | 7.1                                       | 494                                      | 22.7                                   | (0.20, 0.42)               | [214] |
| PyB                | 599                                      | 33                       | 2.8                                               | -                                         | -                                        | -                                      | -                          | [215] |
| PyB-F              | 604                                      | 28                       | 1.5                                               | -                                         | -                                        | -                                      | -                          | [215] |
| BS                 | 526                                      | 11                       | 2.7                                               | -                                         | -                                        | -                                      | -                          | [215] |
| 3-BPh <sub>2</sub> | 666/704                                  | < 1                      | 1                                                 | -                                         | -                                        | -                                      | -                          | [216] |
| 2-NPh <sub>2</sub> | 544                                      | 4                        | -                                                 | -                                         | -                                        | -                                      | -                          | [216] |
| BO2                | 470                                      | 28                       | 140                                               | 0.30                                      | 471                                      | 5.2                                    | (0.16, 0.22)               | [220] |
| BS2                | 491                                      | 81                       | 22                                                | 0.12                                      | 489                                      | 20.9                                   | (0.17, 0.39)               | [220] |
| BO1                | 458                                      | 53                       | 12                                                | 0.06                                      | 462                                      | 12.8                                   | (0.15, 0.15)               | [220] |
| <i>m</i> [B-N]N1   | 483                                      | 91                       | 128.1                                             | 0.15                                      | 479                                      | 36.0                                   | (0.12, 0.27)               | [221] |
| <i>m</i> [B-N]N2   | 491                                      | 90                       | 136.2                                             | 0.13                                      | 485                                      | 33.4                                   | (0.11, 0.32)               | [221] |
| <i>p</i> [B-N]O    | 497                                      | 91                       | -                                                 | 0.44                                      | 493                                      | 26.3                                   | (0.16, 0.51)               | [222] |
| <i>p</i> [B-N]NO   | 529                                      | 89                       | -                                                 | 0.37                                      | 525                                      | 27.6                                   | (0.31, 0.65)               | [222] |

|                 |     |     |       |      |     |      |              |       |
|-----------------|-----|-----|-------|------|-----|------|--------------|-------|
| <i>p</i> [B-N]N | 552 | 83  | -     | 0.32 | 552 | 24.6 | (0.41, 0.57) | [222] |
| <i>t</i> Ph[BN] | 467 | 75  | -     | 0.63 | 463 | 6.1  | (0.14, 0.20) | [223] |
| Cz[BN]          | 478 | 72  | -     | 0.57 | 474 | 7.1  | (0.14, 0.29) | [223] |
| 3B4N            | 428 | 91  | 138.3 | 0.27 | -   | -    | -            | [224] |
| 4B6N            | 459 | 100 | 639.7 | 0.25 | -   | -    | -            | [224] |
| 5B8N            | 480 | 91  | 387.4 | 0.21 | -   | -    | -            | [224] |

(a) The  $\lambda_{\text{PL}}$ , (b) PLQY, (c)  $\tau_{\text{d}}$ , and (d)  $\Delta E_{\text{ST}}$  value in solution or film state. (e) The  $\lambda_{\text{EL}}$ , (f)  $\text{EQE}_{\text{max}}$ , and (g) CIE coordinate of electroluminescence.

Table S11 Summary of photophysical properties and device performance of TADF emitters from one-shot borylation

| Compound             | $\lambda_{\text{FL}}^{\text{a}}$<br>[nm] | PLQY |                                                   | $\Delta E_{\text{ST}}^{\text{d}}$<br>[eV] | $\lambda_{\text{EL}}^{\text{e}}$<br>[nm] | EQE <sub>m</sub><br>ax <sup>f</sup><br>[%] | CIE <sup>g</sup><br>(x, y) | FWHM <sup>h</sup><br>(nm) | Ref.  |
|----------------------|------------------------------------------|------|---------------------------------------------------|-------------------------------------------|------------------------------------------|--------------------------------------------|----------------------------|---------------------------|-------|
|                      |                                          | b    | $\tau_{\text{d}}^{\text{c}}$<br>[ $\mu\text{s}$ ] |                                           |                                          |                                            |                            |                           |       |
| B2                   | 455                                      | 53   | 30.4                                              | 0.19                                      | 460                                      | 18.3                                       | (0.13, 0.11)               | 37                        | [225] |
| B3                   | 441                                      | 33   | -                                                 | 0.15                                      | -                                        | -                                          | -                          | -                         | [225] |
| B4                   | 450                                      | 57   | -                                                 | 0.15                                      | -                                        | -                                          | -                          | -                         | [225] |
| v-DABNA              | 467                                      | 90   | 4.1                                               | 0.017                                     | 469                                      | 34.4                                       | (0.12, 0.11)               | 18                        | [226] |
| $\alpha$ -3BNOH      | 395                                      | -    | 260                                               | 0.22                                      | -                                        | -                                          | -                          | -                         | [227] |
| $\alpha$ -3BNMes     | 442                                      | 63   | 9.08/<br>7060                                     | -                                         | 443                                      | 14.6                                       | (0.15, 0.10)               | 49                        | [228] |
| V-DABNA-<br>Mes      | 484                                      | 80   | 2.4                                               | 0.008<br>5                                | 480                                      | 22.9                                       | (0.09, 0.21)               | 27                        | [229] |
| V-DABNA              | 473                                      | 85   | 1.5                                               | -                                         | 483                                      | 26.2                                       | (0.09, 0.27)               | 17                        | [230] |
| V-DABNA-F            | 459                                      | 91   | 2.1                                               | -                                         | 468                                      | 26.6                                       | (0.12, 0.10)               | 15                        | [230] |
| NOBNacene            | 410/430                                  | 71   | 1180                                              | 0.30                                      | 412                                      | 11.2                                       | (0.18, 0.07)               | 41                        | [231] |
| $\omega$ -DABNA      | 509                                      | 87   | 8.95                                              | 0.011                                     | 512                                      | 31.1                                       | (0.13, 0.73)               | 25                        | [232] |
| CzDABNA-<br>NP-M/TB  | 468                                      | 86   | 106                                               | 0.18                                      | -                                        | -                                          | -                          | -                         | [233] |
| Cz2DABNA-<br>NP-M/TB | 478                                      | 85   | 19                                                | 0.18                                      | 477                                      | 21.8                                       | (0.11, 0.23)               | 27                        | [233] |

|                     |        |      |       |             |     |      |              |    |       |
|---------------------|--------|------|-------|-------------|-----|------|--------------|----|-------|
| CzB2-M/TB           | 491    | 88   | 50    | 0.11        | -   | -    | -            | -  | [233] |
| Cz2B2-M/TB          | 483    | 88   | 42    | 0.11        | -   | -    | -            | -  | [233] |
| CzDABNA-<br>NP      | 461    | 80   | 77    | 0.18        | -   | -    | -            | -  | [233] |
| CzDABNA-<br>NP-TB/H | 465    | 82   | 93    | 0.18        | -   | -    | -            | -  | [233] |
| DABNA-NP-<br>M      | 460    | 88   | 89    | 0.17        | -   | -    | -            | -  | [233] |
| DABNA-NP-<br>TB     | 453    | 83   | 90    | 0.17        | 457 | 19.5 | (0.14, 0.11) | 33 | [233] |
| CzB2-M/P            | 504    | 87   | 24    | 0.06        | 497 | 26.7 | (0.12, 0.57) | 29 | [233] |
| BN1                 | 458    | 91   | 126.6 | 0.15        | 456 | 30.0 | (0.14, 0.06) | 24 | [234] |
| BN2                 | 467    | 93   | 74.6  | 0.13        | 468 | 32.9 | (0.12, 0.10) | 22 | [234] |
| BN3                 | 458    | 98   | 17.8  | 0.12        | 457 | 36.3 | (0.14, 0.07) | 21 | [234] |
| <i>t</i> DPAC-BN    | 460    | 94.4 | 113.8 | 0.17        | 460 | 21.6 | (0.14, 0.09) | 28 | [235] |
| <i>t</i> DMAC-BN    | 475    | 89.7 | 64.2  | 0.15        | 472 | 22.3 | (0.12, 0.19) | 34 | [235] |
| TPD4PA              | 445    | 88.1 | 4.7   | 0.05        | 455 | 30.7 | (0.14, 0.06) | 29 | [236] |
| <i>t</i> Bu-TPD4PA  | 451    | 90.3 | 5.6   | 0.06        | 460 | 32.5 | (0.14, 0.07) | 29 | [236] |
| PTZBN2              | 483TOL | 95   | 22.4  | 0.15T<br>OL | 478 | 34.8 | (0.15, 0.29) | 48 | [237] |
| PTZBN3              | 468TOL | 98   | 26.5  | 0.17T<br>OL | 468 | 32.0 | (0.15, 0.24) | 46 | [237] |



|                          |     |      |      |       |     |      |              |    |       |
|--------------------------|-----|------|------|-------|-----|------|--------------|----|-------|
| <i>t</i> -DAB-DPA        | 446 | 94   | 28.8 | 0.10  | 459 | 27.6 | (0.14, 0.08) | 26 | [238] |
| <i>m</i> BP-<br>DABNA-Me | 467 | 97   | 64.5 | 0.128 | 468 | 24.3 | (0.12, 0.14) | 28 | [240] |
| <i>p</i> BP-<br>DABNA-Me | 462 | 98   | 53   | 0.176 | 464 | 23.4 | (0.13, 0.09) | 23 | [241] |
| DPMX-<br>CzDABNA         | 481 | 94.2 | 14.8 | 0.11  | 484 | 27.4 | (0.10, 0.32) | 29 | [242] |
| C-BN                     | 454 | 98   | 64.8 | 0.21  | 453 | 26.6 | (0.14, 0.07) | 25 | [243] |

(a) The  $\lambda_{\text{PL}}$ , (b) PLQY, (c)  $\tau_{\text{d}}$ , and (d)  $\Delta E_{\text{ST}}$  value in solution or film state. (e) The  $\lambda_{\text{EL}}$ , (f)  $\text{EQE}_{\text{max}}$ , (g) CIE coordinate, and (h) FWHM of electroluminescence.

Table S12 Summary of photophysical properties and device performance of TADF emitters from free-radical-involved C–H transformations

| Compound | $\lambda_{\text{FL}}^{\text{a}}$<br>[nm] | PLQY <sup>b</sup><br>[%] | $\tau_{\text{d}}^{\text{c}}$<br>[ $\mu\text{s}$ ] | $\Delta E_{\text{ST}}^{\text{d}}$<br>[eV] | $\lambda_{\text{EL}}^{\text{e}}$<br>[nm] | EQE <sub>max</sub> <sup>f</sup><br>[%] | CIE <sup>g</sup><br>(x, y) | Ref.  |
|----------|------------------------------------------|--------------------------|---------------------------------------------------|-------------------------------------------|------------------------------------------|----------------------------------------|----------------------------|-------|
| PHzBCO   | 524                                      | 52                       | 9.3                                               | 0.006                                     | 520                                      | 19.6                                   | (0.32, 0.50)               | [245] |
| TRZ-Ph   | 491                                      | 95                       | 4.6                                               | 0.03                                      | 490                                      | 22.6                                   | (0.19, 0.40)               | [247] |
| TRZ-Bu   | 463                                      | 73                       | 51                                                | 0.19                                      | 466                                      | 7.4                                    | (0.16, 0.21)               | [247] |
| Pm-Ph    | 463                                      | 86                       | 55                                                | 0.20                                      | 470                                      | 9.4                                    | (0.15, 0.23)               | [247] |
| IP-6-TPA | 600                                      | 70                       | 12.4                                              | 0.08                                      | -                                        | 9.0                                    | (0.51, 0.49)               | [249] |
| IP-9-TPA | 600                                      | 35                       | 95.4                                              | 0.11                                      | -                                        | 4.9                                    | (0.51, 0.48)               | [249] |
| AZA-BN   | 522                                      | 94                       | 160                                               | 0.18                                      | 528                                      | 25.7                                   | (0.28, 0.69)               | [250] |

(a) The  $\lambda_{\text{PL}}$ , (b) PLQY, (c)  $\tau_{\text{d}}$ , and (d)  $\Delta E_{\text{ST}}$  value in solution or film state. (e) The  $\lambda_{\text{EL}}$ , (f) EQE<sub>max</sub>, and (g) CIE coordinate of electroluminescence.

Table S13 Summary of photophysical properties and device performance of TADF emitters from C–H vulcanization and selenidation

| Compound    | $\lambda_{\text{FL}}^{\text{a}}$<br>[nm] | PLQY <sup>b</sup><br>[%] | $\tau_{\text{d}}^{\text{c}}$<br>[ $\mu\text{s}$ ] | $\Delta E_{\text{ST}}^{\text{d}}$<br>[eV] | $\lambda_{\text{EL}}^{\text{e}}$<br>[nm] | EQE <sub>max</sub> <sup>f</sup><br>[%] | CIE <sup>g</sup><br>(x, y) | Ref.  |
|-------------|------------------------------------------|--------------------------|---------------------------------------------------|-------------------------------------------|------------------------------------------|----------------------------------------|----------------------------|-------|
| helicene-BN | 520                                      | 98                       | 71.8                                              | 0.15                                      | 523                                      | 31.5                                   | (0.26, 0.66)               | [257] |
| PSeZTRZ     | -                                        | 86                       | -                                                 | 0.05                                      | -                                        | 16.9                                   | -                          | [259] |
| SeDF-G      | -                                        | 7.6                      | 18.5                                              | 0.08                                      | -                                        | 30.8                                   | (0.31, 0.53)               | [260] |
| SeDF-B      | -                                        | 8.5                      | 3.9                                               | 0.15                                      | -                                        | 25.8                                   | (0.19, 0.16)               | [260] |
| SeDF-YG     | -                                        | 2.6                      | 4.6                                               | 0.15                                      | -                                        | 23.9                                   | (0.37, 0.51)               | [260] |
| PSeBz       | 510                                      | -                        | -                                                 | -                                         | 510                                      | -                                      | -                          | [261] |
| oPSeZBN     | -                                        | 3                        | -                                                 | 0.00                                      | -                                        | -                                      | -                          | [262] |
| BNSSe       | 520                                      | 99                       | 12.7                                              | 0.12                                      | 515                                      | 35.7                                   | (0.37, 0.51)               | [263] |
| BNSeSe      | 514                                      | 100                      | 9.9                                               | 0.14                                      | 512                                      | 36.8                                   | (0.37, 0.51)               | [263] |
| BN-Se       | 502                                      | 99                       | 5.2                                               | 0.08                                      | 506                                      | 32.6                                   | (0.15, 0.62)               | [264] |

(a) The  $\lambda_{\text{PL}}$ , (b) PLQY, (c)  $\tau_{\text{d}}$ , and (d)  $\Delta E_{\text{ST}}$  value in solution or film state. (e) The  $\lambda_{\text{EL}}$ , (f) EQE<sub>max</sub>, and (g) CIE coordinate of electroluminescence.

Table S14 Summary of photophysical properties and device performance of TADF emitters from C–H bond transformation-involved umpolung reactions

| Compound   | $\lambda_{\text{FL}}^{\text{a}}$<br>[nm] | PLQY <sup>b</sup><br>[%] | $\tau_{\text{d}}^{\text{c}}$<br>[ $\mu\text{s}$ ] | $\Delta E_{\text{ST}}^{\text{d}}$<br>[eV] | $\lambda_{\text{EL}}^{\text{e}}$<br>[nm] | EQE <sub>max</sub> <sup>f</sup><br>[%] | CIE <sup>g</sup><br>(x, y) | Ref.  |
|------------|------------------------------------------|--------------------------|---------------------------------------------------|-------------------------------------------|------------------------------------------|----------------------------------------|----------------------------|-------|
| DDCzIPN    | 477                                      | 91                       | 2.8                                               | 0.13                                      | 497                                      | 18.9                                   | (0.22, 0.46)               | [268] |
| DDTPAIPN   | 543                                      | 93                       | 1.5                                               | 0.17                                      | 528                                      | 16.9                                   | (0.30, 0.61)               | [269] |
| DTPAmCPIPn | 566                                      | 100                      | 1.7                                               | 0.15                                      | 544                                      | 19.2                                   | (0.38, 0.57)               | [269] |
| DDmCPIPn   | 535                                      | 76                       | 2.1                                               | 0.13                                      | 532                                      | 15.7                                   | (0.37, 0.57)               | [269] |
| TXO-TPA    | 630                                      | 83                       | 51.8                                              | 0.05                                      | 552                                      | 18.5                                   | (0.45, 0.53)               | [271] |
| TXO-PhCz   | 580                                      | 90                       | 87.3                                              | 0.07                                      | -                                        | 21.5                                   | (0.31, 0.56)               | [271] |
| CzTXO      | -                                        | 30                       | 1860                                              | 0.10                                      | -                                        | 11.2                                   | (0.16, 0.20)               | [272] |
| CzSOXO     | -                                        | 51                       | 14.3                                              | 0.05                                      | -                                        | 13.6                                   | (0.37, 0.57)               | [272] |
| MTXSFCz    | 451                                      | -                        | 45.3                                              | 0.19                                      | -                                        | -                                      | -                          | [273] |
| TXO1-TPA   | 565                                      | 25                       | 2.5                                               | 0.29                                      | -                                        | -                                      | -                          | [274] |
| DTXO-TPA2  | 569                                      | 70                       | 30                                                | 0.10                                      | 588                                      | 25.0                                   | (0.51, 0.48)               | [275] |
| DTXO-PhCz2 | 537                                      | 54                       | 23                                                | 0.15                                      | 548                                      | 15.7                                   | (0.41, 0.55)               | [275] |
| P1         | 532                                      | 72                       | 29.5                                              | 0.08                                      | 568                                      | 5.4                                    | (0.45, 0.53)               | [276] |
| P2         | 535                                      | 55                       | 19.6                                              | 0.06                                      | 568                                      | 3.0                                    | (0.46, 0.53)               | [276] |
| QBP-DMAC   | 498                                      | 78                       | 1870                                              | 0.33                                      | 523                                      | 18.8                                   | (0.30, 0.53)               | [278] |
| QBP-PXZ    | 535                                      | 65                       | 2.3                                               | 0.06                                      | 550                                      | 16.6                                   | (0.41, 0.55)               | [278] |

(a) The  $\lambda_{\text{PL}}$ , (b) PLQY, (c)  $\tau_{\text{d}}$ , and (d)  $\Delta E_{\text{ST}}$  value in solution or film state. (e) The  $\lambda_{\text{EL}}$ , (f) EQE<sub>max</sub>, and (g) CIE coordinate of electroluminescence.

Table S15 Summary of photophysical properties and device performance of TADF emitters from other novel C–H bond transformations

| Compound      | $\lambda_{\text{FL}}^{\text{a}}$<br>[nm] | PLQY <sup>b</sup><br>[%] | $\tau_{\text{d}}^{\text{c}}$<br>[ $\mu\text{s}$ ] | $\Delta E_{\text{ST}}^{\text{d}}$<br>[eV] | $\lambda_{\text{EL}}^{\text{e}}$<br>[nm] | EQE <sub>max</sub> <sup>f</sup><br>[%] | CIE <sup>g</sup><br>(x, y) | Ref.  |
|---------------|------------------------------------------|--------------------------|---------------------------------------------------|-------------------------------------------|------------------------------------------|----------------------------------------|----------------------------|-------|
| D2T-TRZ       | 493                                      | 99                       | 2.1                                               | 0.01                                      | 500                                      | 27.1                                   | (0.22, 0.46)               | [279] |
| 2S-TRZ        | 507                                      | 99                       | 2.4                                               | 0.03                                      | -                                        | 35.6                                   | -                          | [159] |
| IT-TRZ        | 505                                      | 98                       | 2.2                                               | 0.03                                      | -                                        | 36.1                                   | -                          | [159] |
| IA-TRZ        | 517                                      | 96                       | 2.4                                               | -0.02                                     | -                                        | 32.0                                   | -                          | [159] |
| D2Y-TRZ       | 491                                      | 71                       | 86                                                | 0.41                                      | -                                        | 16.4                                   | (0.22, 0.47)               | [281] |
| <i>p</i> -D2T | 514                                      | 99                       | 2.4                                               | 0.14                                      | 496                                      | 25.6                                   | (0.20, 0.45)               | [282] |
| <i>m</i> -D2T | 514                                      | 81                       | 1.6                                               | 0.12                                      | 492                                      | 22.3                                   | (0.20, 0.43)               | [282] |
| <i>c</i> -D2T | 504                                      | 88                       | 2.4                                               | 0.17                                      | 484                                      | 26.3                                   | (0.17, 0.35)               | [282] |
| QAc-TRZ       | 494                                      | 97                       | 3.4                                               | 0.08                                      | -                                        | 37.3                                   | -                          | [283] |

(a) The  $\lambda_{\text{PL}}$ , (b) PLQY, (c)  $\tau_{\text{d}}$ , and (d)  $\Delta E_{\text{ST}}$  value in solution or film state. (e) The  $\lambda_{\text{EL}}$ , (f) EQE<sub>max</sub>, and (g) CIE coordinate of electroluminescence.
